# Supplementary material for: Precise infliximab exposure and pharmacodynamic control to achieve deep remission in paediatric Crohn’s disease (REMODEL-CD): study protocol for a multicentre, open-label, pragmatic clinical trial in the USA
Source: PubMed Central journal article supplement — BMJ Open. 2024 Mar 25;14(3):e077193. doi: 10.1136/bmjopen-2023-077193 (PMC10966820; doi:10.1136/bmjopen-2023-077193), 2024-03-25
Supplement: bmjopen-2023-077193supp002.pdf [file bmjopen-2023-077193supp002.pdf]

**Supplementary Table1: Specific Pharmacodynamic (PD) Treatment Failure Criteria and the Target Escalation Plan**

| Specific PD Target                                                     | Timing by infusion (~week)                      | PCDAI/CDAI cut-points                                           | (and/or) CRP cut-points   | (and/or) fecal calprotectin cut-points |
|------------------------------------------------------------------------|-------------------------------------------------|-----------------------------------------------------------------|---------------------------|----------------------------------------|
| Checkpoint 2                                                           | Dose4 (~week10-14)                              | delta PCDAI<12.5 or a PCDAI>30 (child)<br>delta CDAI<70 (adult) | <50% change from baseline | <50% change from baseline              |
| Checkpoint 3                                                           | Dose6 (~week26)                                 | PCDAI≥10<br>CDAI≥150                                            | >0.5 g/dL                 | >250 µg/g                              |
| PD Target Failure for <i>any 2 consecutive</i> infusions after (dose6) |                                                 | PCDAI≥30<br>CDAI>220                                            | ≥1 g/dL                   | ---                                    |
| PD Target Failure for <i>any single</i> infusion after dose6           |                                                 |                                                                 |                           | >500 µg/g                              |
| Target Escalation plan*                                                | <b>PD Failure1:</b> New PK target = 10-15 µg/mL | <b>PD Failure2:</b> New PK target = 15-20 µg/mL (max)           |                           |                                        |

\*The trough concentration is the primary target, therefore, pharmacodynamic targets are only instituted if the prior trough concentration was within the target. PCDAI, pediatric Crohn's disease activity index; CDAI, Crohn's disease activity index; CRP, c-reactive protein; PK, pharmacokinetic.

**Supplementary Table 2. Criteria for Secondary Nonresponse and Study Withdrawal**

|                                                               |                                                                                                                                                                                                                                                                                                                                                                                                                                                                                                                                                                                                                                                                                                                                                                                                                                                                                                                                                                                                                                                                                                                                                                                                                                                                                                                           |
|---------------------------------------------------------------|---------------------------------------------------------------------------------------------------------------------------------------------------------------------------------------------------------------------------------------------------------------------------------------------------------------------------------------------------------------------------------------------------------------------------------------------------------------------------------------------------------------------------------------------------------------------------------------------------------------------------------------------------------------------------------------------------------------------------------------------------------------------------------------------------------------------------------------------------------------------------------------------------------------------------------------------------------------------------------------------------------------------------------------------------------------------------------------------------------------------------------------------------------------------------------------------------------------------------------------------------------------------------------------------------------------------------|
| <b>Secondary Nonresponse (may remain in the trial)</b>        | <ul style="list-style-type: none"> <li>• Remaining on prednisone/prednisolone or oral budesonide for &gt;14 weeks after week20 (corticosteroid restarts) or remaining on prednisone/prednisolone or oral budesonide after week44</li> </ul>                                                                                                                                                                                                                                                                                                                                                                                                                                                                                                                                                                                                                                                                                                                                                                                                                                                                                                                                                                                                                                                                               |
| <b>Secondary Nonresponse (meet study withdrawal criteria)</b> | <ul style="list-style-type: none"> <li>• Subjects in the conventional care arm receiving &gt;10 mg/kg infliximab and/or &lt;25 days apart between infusions during maintenance.</li> <li>• Subjects in the precision care arm receiving &gt;12.5 mg/kg infliximab during induction (first 3 doses)</li> <li>• Subjects in the precision care arm receiving &gt;15 mg/kg infliximab and/or &lt;25 days apart between infusions during maintenance.</li> <li>• Subjects who have a Crohn's disease-related surgery</li> <li>• Subjects who develop an intra-abdominal abscess or inflammatory mass</li> <li>• Subjects diagnosed with a bacterial infection requiring intravenous antibiotics or hospitalization (related to the infection)</li> <li>• Subjects who discontinuation of infliximab before week42 (either initiated by the subject or treating physician)</li> <li>• Any plan to start another biologic (anti-integrin, anti-cytokine), small molecule (any JAK inhibitor or sphingosine-1-phosphage inhibitor) or 6-mercaptopurine (including Imuran or azathioprine) during the trial</li> <li>• Anaphylaxis (hypersensitivity reaction) during/after an infusion that is deemed by the provider, medical monitor or principal investigator to be unsafe to attempt a subsequent future infusion</li> </ul> |
